# Supplementary material for: Classification and Genome-Wide Analysis of Chitin-Binding Proteins Gene Family in Pepper (Capsicum annuum L.) and Transcriptional Regulation to Phytophthora capsici, Abiotic Stresses and Hormonal Applications
Source: PubMed Central journal article supplement (PMC6121964; doi:10.3390/ijms19082216), 2018-07-29
Supplement: ijms-19-02216-s001.pdf [file ijms-19-02216-s001.pdf]

# Classification and genome-wide analysis of chitin-binding proteins gene family in pepper (*Capsicum annuum* L.) and transcriptional regulation to *Phytophthora capsici*, abiotic stresses and hormonal applications

Muhammad Ali, De-Xu Luo, Abid Khan, Saeed ul Haq, Wen-Xian Gai, Huai-Xia Zhang, Guo-Xin Cheng, Izhar Muhammad, Zhen-Hui Gong

**Table S1.** Primers for gene sequencing and confirmation.

| Gene Name        | Accession#      | Primer sequence (5'→3')     |
|------------------|-----------------|-----------------------------|
| <i>CaChiI1</i>   | Capana07g001653 | F ATGAAGCTTTGTGAATTCACAGC   |
|                  |                 | R TTACATAGAATCGATTAAGAGTCCA |
| <i>CaChiI2</i>   | Capana10g001143 | F CACTTTGTCACTTTCTTTCCATCAC |
|                  |                 | R CCTCGTCAAAAATATTTTCTTCCAG |
| <i>CaChiI3</i>   | CA10g09850      | F GCCACTTGTTTCCCATTACC      |
|                  |                 | R CTGATCTCAAAGTTGAACTTATC   |
| <i>CaChiIII1</i> | Capana03g000778 | F ATGATGAGAACTAGAGAGACAGC   |
|                  |                 | R CTAGAGAGCATTGAGCAGGAAG    |
| <i>CaChiIII3</i> | CA03g30170      | F CCATCCTGTCATCACAAAATGATG  |
|                  |                 | R GGAACGACCAACATCTAGCTAG    |
| <i>CaChiIII5</i> | CA03g30190      | F CGTCTTATAACAATTCACAAAATG  |
|                  |                 | R CTTGTTATACGAGGTTAGACC     |
| <i>CaChiIV2</i>  | Capana06g002084 | F ATGTTGGCTCAGAATTGTGAGTG   |
|                  |                 | R CTAACAAGAGAGATTATCCCCAG   |
| <i>CaChiVI1</i>  | CA07g09480      | F GTAAGAAAGAAGCATAAAGAG     |
|                  |                 | R GTATCATACGTTTCATTAGTTGG   |
| <i>CaChiVI2</i>  | Capana08g001237 | F ATGGAGAAGCTAAGTACTACTGC   |
|                  |                 | R TCAGTTATCACCACAATCAAC     |
| <i>CaChiVI3</i>  | CA08g10220      | F CAACCACATTATAGCAGCTCT     |
|                  |                 | R CAGACTAAACAGAGCCATG       |

**Table S2.** Chemistry and domains organization of CaChi's genes of pepper.

| Genes            | Domains Interval |                |              |                          | Formula | Total number of atoms                                                                 |        |
|------------------|------------------|----------------|--------------|--------------------------|---------|---------------------------------------------------------------------------------------|--------|
|                  | Chitin_bind_1    | Glyco_hydro_19 | super family | chitinase_glyco_hydro_19 |         |                                                                                       | Barwin |
| <i>CaChiI1</i>   | 24-62            | 84-316         |              | ---                      | ---     | C <sub>1554</sub> H <sub>2366</sub> N <sub>452</sub> O <sub>461</sub> S <sub>23</sub> | 4856   |
| <i>CaChiI2</i>   | 24-62            | 84-187         |              | ---                      | ---     | C <sub>897</sub> H <sub>1375</sub> N <sub>261</sub> O <sub>259</sub> S <sub>14</sub>  | 2806   |
| <i>CaChiI3</i>   | 24-62            | 84-154         |              | ---                      | ---     | C <sub>715</sub> H <sub>1096</sub> N <sub>200</sub> O <sub>221</sub> S <sub>13</sub>  | 2245   |
| <i>CaChiIII1</i> | 47-85            |                |              | ---                      | ---     | C <sub>735</sub> H <sub>1149</sub> N <sub>209</sub> O <sub>223</sub> S <sub>19</sub>  | 2335   |
|                  | 97-136           | ---            |              | ---                      | ---     |                                                                                       |        |
| <i>CaChiIII2</i> | 35-73            |                |              | ---                      | ---     | C <sub>908</sub> H <sub>1373</sub> N <sub>271</sub> O <sub>274</sub> S <sub>26</sub>  | 2852   |
|                  | 83-119           | ---            |              | ---                      | ---     |                                                                                       |        |
|                  | 143-181          |                |              | ---                      | ---     |                                                                                       |        |
| <i>CaChiIII3</i> | 48-86            |                |              | ---                      | ---     | C <sub>1252</sub> H <sub>1927</sub> N <sub>349</sub> O <sub>369</sub> S <sub>36</sub> | 3933   |
|                  | 102-140          | ---            |              | ---                      | ---     |                                                                                       |        |
|                  | 156-194          |                |              | ---                      | ---     |                                                                                       |        |
|                  | 210-248          |                |              | ---                      | ---     |                                                                                       |        |
| <i>CaChiIII4</i> | 2-36             |                |              | ---                      | ---     | C <sub>756</sub> H <sub>1151</sub> N <sub>213</sub> O <sub>234</sub> S <sub>26</sub>  | 2380   |
|                  | 52-90            | ---            |              | ---                      | ---     |                                                                                       |        |
|                  | 106-143          |                |              | ---                      | ---     |                                                                                       |        |
| <i>CaChiIII5</i> | 57-95            |                |              | ---                      | ---     | C <sub>985</sub> H <sub>1570</sub> N <sub>290</sub> O <sub>279</sub> S <sub>16</sub>  | 3140   |
|                  | 103-119          | ---            |              | ---                      | ---     |                                                                                       |        |
| <i>CaChiIII6</i> | 49-87            |                |              | ---                      | ---     | C <sub>691</sub> H <sub>1079</sub> N <sub>187</sub> O <sub>223</sub> S <sub>18</sub>  | 2198   |
|                  | 96-132           | ---            |              | ---                      | ---     |                                                                                       |        |
| <i>CaChiIII7</i> | 48-85            |                |              | ---                      | ---     | C <sub>894</sub> H <sub>1400</sub> N <sub>250</sub> O <sub>306</sub> S <sub>26</sub>  | 2876   |
|                  | 94-132           | ---            |              | ---                      | ---     |                                                                                       |        |
|                  | 143-181          |                |              | ---                      | ---     |                                                                                       |        |
| <i>CaChiIV1</i>  | 33-59            | ---            |              | 78-277                   | ---     | C <sub>1320</sub> H <sub>1959</sub> N <sub>357</sub> O <sub>414</sub> S <sub>19</sub> | 4069   |

|                 |       |     |        |        |                                                                                       |      |
|-----------------|-------|-----|--------|--------|---------------------------------------------------------------------------------------|------|
| <i>CaChiIV2</i> | 3-34  | --- | 53-252 | ---    | C <sub>1226</sub> H <sub>1832</sub> N <sub>330</sub> O <sub>379</sub> S <sub>21</sub> | 3788 |
| <i>CaChiVI1</i> | 22-59 | --- | ---    | ---    | C <sub>374</sub> H <sub>599</sub> N <sub>117</sub> O <sub>127</sub> S <sub>9</sub>    | 1226 |
| <i>CaChiVI2</i> | 26-65 | --- | ---    | 83-198 | C <sub>913</sub> H <sub>1423</sub> N <sub>273</sub> O <sub>288</sub> S <sub>15</sub>  | 2912 |
| <i>CaChiVI3</i> | 26-65 | --- | ---    | 78-193 | C <sub>956</sub> H <sub>1496</sub> N <sub>288</sub> O <sub>302</sub> S <sub>16</sub>  | 3058 |
| <i>CaChiVI4</i> | 43-80 | --- | ---    | ---    | C <sub>514</sub> H <sub>812</sub> N <sub>150</sub> O <sub>152</sub> S <sub>13</sub>   | 1641 |

Table S3. Ten highly conserved motifs found in CaChi's proteins.

| No. | Motif consensus sequence                                                             | E-value  | Regular expression (RE) describing the motif.         | Length (AA) |
|-----|--------------------------------------------------------------------------------------|----------|-------------------------------------------------------|-------------|
| 1   | 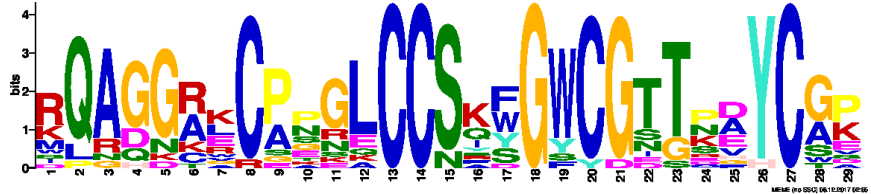   | 1.5e-156 | RQAGGRKCPPGLCCSKFGWCGTTPAYCGP                         | 29          |
| 2   |   | 6.8e-060 | NFYSYNAFINAVRSFPGFTTGDTTARKRE<br>IAAFFAQTTH           | 40          |
| 3   |  | 1.2e-044 | RGPQLSWNFNYGPAGKAIGFDGLNDPDIV<br>ARDPVISFKTALWYWMNNCH | 50          |

|   |  |          |                                                                  |    |
|---|--|----------|------------------------------------------------------------------|----|
| 4 |  | 1.2e-039 | <p>NCQSQCPSGSPSPKPPTPGPRPGDISGVIS<br/>NSMFDQMLKHRNDNACQ GK</p>   | 49 |
| 5 |  | 1.6e-034 | <p>LLLALLLTVSAEQS</p>                                            | 15 |
| 6 |  | 2.2e-024 | <p>PTGQCCSISGWCGATEDYCEE</p>                                     | 21 |
| 7 |  | 3.8e-023 | <p>QNV RATYHLYNPQNVGWDLNAVSA YCSTWD<br/>ANKPLAWRSKYGWTAFCGPV</p> | 50 |
| 8 |  | 2.2e-019 | <p>AQTIVRIVDQCSNGGLDLIN VFRQIDTDGV<br/>GNQRGHLIVDYQFVDCGDN</p>   | 50 |

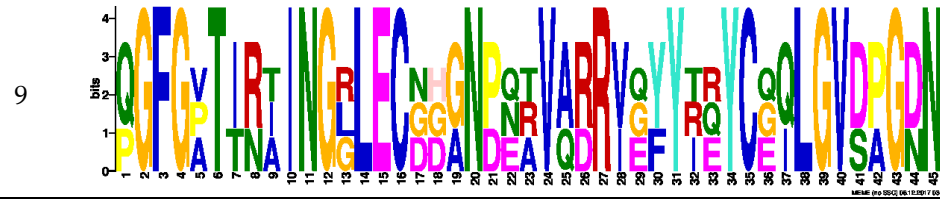

7.6e-017

QGFGPTIRAINGRLECDGPNQAVARRVEY  
YTQYCEQLGVDPGDN

45

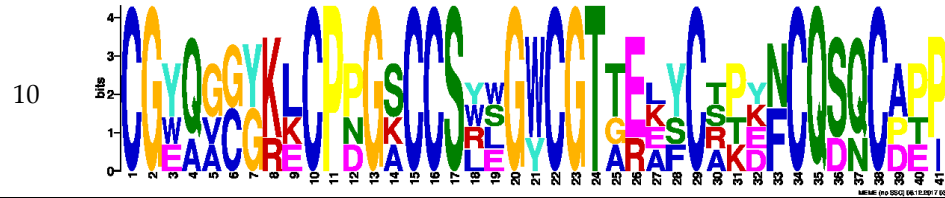

3.3e-016

CGYQGGKLCPPGSCCSWWGWCGTTEEYCS  
PEFCQSQCAPP

41

**Table S4.** Function of the *cis*-acting elements found in the promoter region of CaChi's.

| Cis acting elements                             | Motif           | Function                                          | Reference |
|-------------------------------------------------|-----------------|---------------------------------------------------|-----------|
| Defense-related and stress stimulative elements | TC-rich repeats | Defense and stress responsiveness                 | [1]       |
|                                                 | W box           | Fungal elicitor-responsive element                | [2]       |
|                                                 | WUN-motif       | Wound-responsive element                          | [3]       |
|                                                 | HSE             | Heat stress responsiveness                        | [3]       |
|                                                 | LTR             | Low temperature responsiveness                    | [4]       |
|                                                 | MBS             | MYB binding site involved in drought-inducibility | [5]       |
| Plant hormones responsive elements              | CGTCA-motif     | MeJA responsiveness                               | [6]       |
|                                                 | GARE-motif      | GA-responsive element                             | [7]       |
|                                                 | TCA-element     | Salicylic acid responsiveness                     | [8]       |
|                                                 | TGA-element     | Auxin-responsive element                          | [3]       |
|                                                 | ERE             | Ethylene-responsive element                       | [9]       |
|                                                 | ABRE            | ABA responsiveness                                | [10]      |
|                                                 | AuxRR-core      | Auxin responsiveness                              | [11]      |
|                                                 | P-box           | GA-responsive element                             | [12]      |

**Table S5.** Primers for qRT-PCR of CaChi's genes of pepper.

| Gene name        | RT-PCR Primer sequence (5'→3')                         | Product length |
|------------------|--------------------------------------------------------|----------------|
| <i>CaChiI1</i>   | F: AAACCTCCCATGAACTACCG<br>R: GTTAAAAGGTCAACTCCGATGG   | 227            |
| <i>CaChiI2</i>   | F: GGACATCAGCGGTGTAATCT<br>R: CAGCATTGATGAAGGCATTGT    | 116            |
| <i>CaChiI3</i>   | F: CTATTGCTCTCTTATTGCTGATGG<br>R: CAGGACCACAATAGGCATCG | 133            |
| <i>CaChiIII1</i> | F: TCTTCCCTTTCATCTTCCAACC<br>R: AGTTTGTTCTCCGCATCGTC   | 229            |
| <i>CaChiIII2</i> | F: CTCCACCTCCACCTAATTTCC<br>R: CCACACCAACCCCATCTAC     | 100            |
| <i>CaChiIII3</i> | F: TGGTGCGGA ACTACAGAAAAG<br>R: TTCTACCATCAGCTTGCCTTC  | 127            |
| <i>CaChiIII4</i> | F: GGAATGCAAGCTGATGGTAGA<br>R: CTCTGACTTTGACACCACTCTT  | 110            |
| <i>CaChiIII5</i> | F: GAAAGCAAGCTGCTGGTAGA<br>R: TGACTTTGACAGTAGGGAGAAC   | 106            |
| <i>CaChiIII6</i> | F: GTCCTAGTGAAGAGTGTGTAGTT<br>R: CGCATAAACCTGGCTCTTCT  | 114            |
| <i>CaChiIII7</i> | F: TCAGCCAAAACATCTCTTCCC                               | 121            |

|                 |                                                       |     |
|-----------------|-------------------------------------------------------|-----|
|                 | R: CATCAGGGCATTCTCTACCAC                              |     |
| <i>CaChiIV1</i> | F: TCTTTGCTCATGTCACCCAC<br>R: ATCTCTTGCAACTATGTCAGGG  | 227 |
| <i>CaChiIV2</i> | F: TCAAGTGCTATCCTGAATTCGG<br>R: CTTCCAGAGACACAAGGGTAC | 182 |
| <i>CaChiVI1</i> | F: CAATACGGGTTCTGTGGTACG<br>R: CAACATTTTCAGCTTCGCCAG  | 103 |
| <i>CaChiVI2</i> | F: TGGGACTTGAATGCGGTTAG<br>R: TCACTATCGTCTGAGCTCCTG   | 178 |
| <i>CaChiVI3</i> | F: CGACATGGGATGCTAATAAGCC<br>R: CGTTGTTTGAGCTCTGGTTCG | 143 |
| <i>CaChiVI4</i> | F: GTCTTTGTGATTTTGGCCCTG<br>R: TTGGCGAACATGGTAGTGG    | 191 |

## References

1. Diaz-De-Leon, F.; Klotz, K. L.; Lagrimini, L. M. Nucleotide sequence of the tobacco (*Nicotiana tabacum*) anionic peroxidase gene. *Plant Physiol.* **1993**, *101*, 1117–1118, doi:10.1104/pp.101.3.1117.
2. Rushton, P. J.; Torres, J. T.; Parniske, M.; Wernert, P.; Hahlbrock, K.; Somssich, I. E. Interaction of elicitor-induced DNA-binding proteins with elicitor response elements in the promoters of parsley PR1 genes. *EMBO J.* **1996**, *15*, 5690–5700, doi:10.1002/J.1460-2075.1996.TB00953.X.
3. Pastuglia, M.; Roby, D.; Dumas, C.; Cock, J. M. Rapid induction by wounding and bacterial infection of an S gene family receptor-like kinase gene in *Brassica oleracea*. *Plant Cell* **1997**, *9*, 49–60.
4. White, A. J.; Dunn, M. A.; Brown, K.; Hughes, M. A. Comparative analysis of genomic sequence and expression of a lipid transfer protein gene family in winter barley. **1994**, *45*, 1885–1892.
5. Nash, J.; Luehrsen, K. R.; Walbot, V. Bronze-2 gene of maize: reconstruction of a wild-type allele and analysis of transcription and splicing. *Plant Cell* **1990**, *2*, 1039–1049, doi:10.1105/tpc.2.11.1039.
6. Rouster, J.; Leah, R.; Mundy, J.; Cameron-Mills, V. Identification of a methyl jasmonate-responsive region in the promoter of a lipoxygenase 1 gene expressed in barley grain. *Plant J.* **1997**, *11*, 513–523, doi:10.1046/j.1365-313X.1997.11030513.x.
7. Skriver, K.; Olsen, F. L.; Rogers, J. C.; Mundy, J. cis-acting DNA elements responsive to gibberellin and its antagonist abscisic acid. *Proc. Natl. Acad. Sci.* **1991**, *88*, 7266–7270, doi:10.1073/pnas.88.16.7266.
8. Merkouropoulos, G.; Barnett, D. C.; Shirsat, A. H. The Arabidopsis extensin gene is developmentally regulated, is induced by wounding, methyl jasmonate, abscisic and salicylic acid, and codes for a protein with unusual motifs. *Planta* **1999**, *208*, 212–219, doi:10.1007/s004250050552.

9. Itzhaki, H.; Woodson, W. R. Characterization of an ethylene-responsive glutathione S-transferase gene cluster in carnation. *Plant Mol. Biol.* **1993**, *22*, 43–58, doi:10.1007/BF00038994.
10. Baker, S. S.; Wilhelm, K. S.; Thomashow, M. F. The 5'-region of *Arabidopsis thaliana* cor15a has cis-acting elements that confer cold-, drought- and ABA-regulated gene expression. *Plant Mol. Biol.* **1994**, *24*, 701–713, doi:10.1007/BF00029852.
11. Sakai, T.; Takahashi, Y.; Nagata, T. Analysis of the promoter of the auxin-inducible gene, parC, of tobacco. *Plant Cell Physiol.* **1996**, *37*, 906–913, doi:10.1093/oxfordjournals.pcp.a029038.
12. Kim, J. K.; Cao, J.; Wu, R. Regulation and interaction of multiple protein factors with the proximal promoter regions of a rice high pl  $\alpha$ -amylase gene. *MGG Mol. Gen. Genet.* **1992**, *232*, 383–393, doi:10.1007/BF00266241.
